# Supplementary material for: Synthesis of helically twisted [1 + 1]macrocycles assisted by amidinium–carboxylate salt bridges and control of their chiroptical properties
Source: Royal Society of Chemistry journal article supplement (doi:10.1039/c2ob27054d), 2012-11-20
Supplement: c2ob27054d.pdf [file c2ob27054d.pdf]

*Electronic Supplementary Information for:*

**Synthesis of helically twisted [1+1]macrocycles assisted by amidinium-carboxylate salt bridges and control of their chiroptical properties**

Yuji Nakatani, Yoshio Furusho, and Eiji Yashima\*

*Department of Molecular Design and Engineering, Graduate School of Engineering, Nagoya University, Chikusa-ku, Nagoya, 464-8603, Japan*

E-mail: yashima@apchem.nagoya-u.ac.jp

**Contents**

|             |                                                                                                                                                                |     |
|-------------|----------------------------------------------------------------------------------------------------------------------------------------------------------------|-----|
| <b>1.</b>   | Characterization of [1+1]Macrocycles ( <b>2</b> )                                                                                                              |     |
| <b>1.1.</b> | ESI-Mass Spectra                                                                                                                                               | S2  |
| <b>1.2.</b> | RCM Reaction of the Carboxylic Acid ( <i>o</i> - <b>1b</b> ) Using 1st Generation Grubbs' Catalyst                                                             | S3  |
| <b>1.3.</b> | <sup>1</sup> H NMR (500 MHz, CDCl <sub>3</sub> , 25 °C) Spectra of <i>p</i> -[1+1]Macrocycle ( <i>p</i> - <b>2</b> )<br>with Different <i>cis/trans</i> Ratios | S3  |
| <b>1.4.</b> | CD Spectra of <i>m</i> -[1+1]Macrocycles ( <i>m</i> - <b>2</b> )                                                                                               | S4  |
| <b>2.</b>   | CD and Absorption Spectra of Models                                                                                                                            | S5  |
| <b>3.</b>   | CD and Absorption Spectral Changes of [1+1]Macrocycles in Diluted Acidic Solution                                                                              | S7  |
| <b>4.</b>   | Time-Dependent CD, Absorption and Fluorescence Spectra of [1+1]Macrocycles<br>in the Presence of Zn(ClO <sub>4</sub> ) <sub>2</sub>                            | S8  |
| <b>5.</b>   | Molecular-Mechanics Calculations of <i>trans-trans</i> and <i>cis-cis</i> Isomers of<br><i>m</i> -[1+1]Macrocycle ( <i>m</i> - <b>2</b> )                      | S9  |
| <b>6.</b>   | Supporting References                                                                                                                                          | S10 |

## 1. Characterization of [1+1]Macrocycles (2)

### 1.1. ESI-Mass Spectra

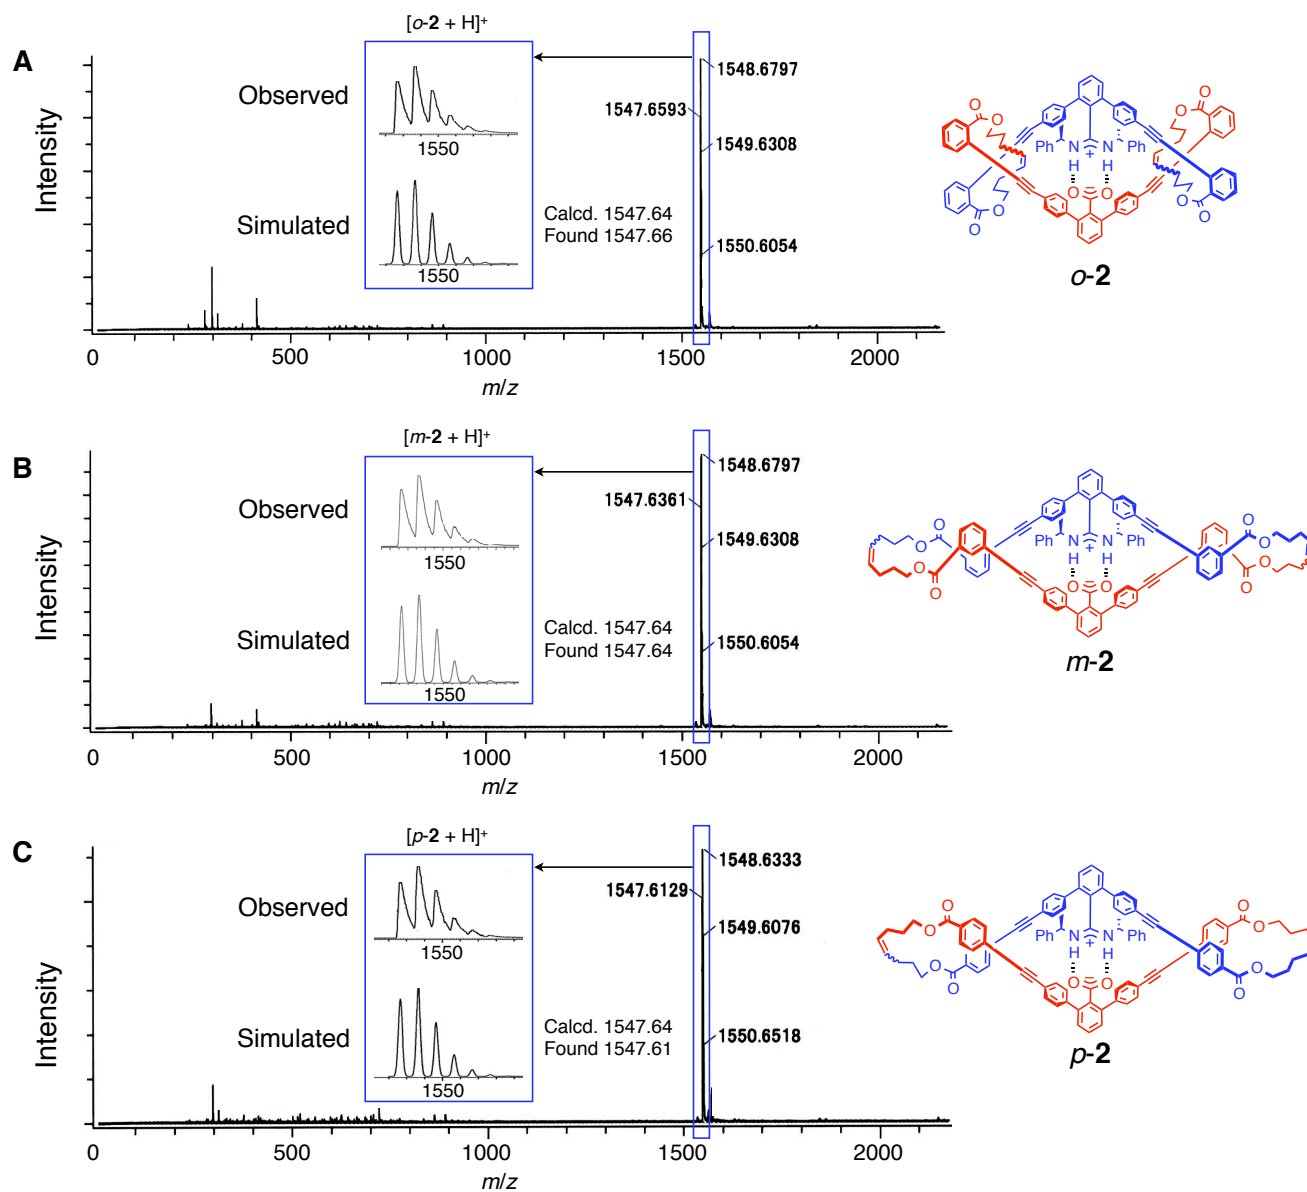

**Figure S1.** Positive mode ESI-MS spectra of (A) *o-2*, (B) *m-2*, and (C) *p-2* in CHCl<sub>3</sub>/MeOH (1/1, v/v).

## 1.2. RCM Reaction of the Carboxylic Acid (*o*-1b) Using 1st Generation Grubbs' Catalyst

**Experimental Procedure:** A solution of the carboxylic acid *o*-1b (6.98 mg, 10.0  $\mu\text{mol}$ ) in dry toluene (100 mL) was deoxygenated by freeze-pump-thaw cycles for 3 times. To this was added the 1st generation Grubbs' catalyst (3.00 mg, 3.50  $\mu\text{mol}$ ), and the reaction mixture was stirred at ambient temperature for 24 h under Ar. The mixture was subjected to ESI-MS analysis.

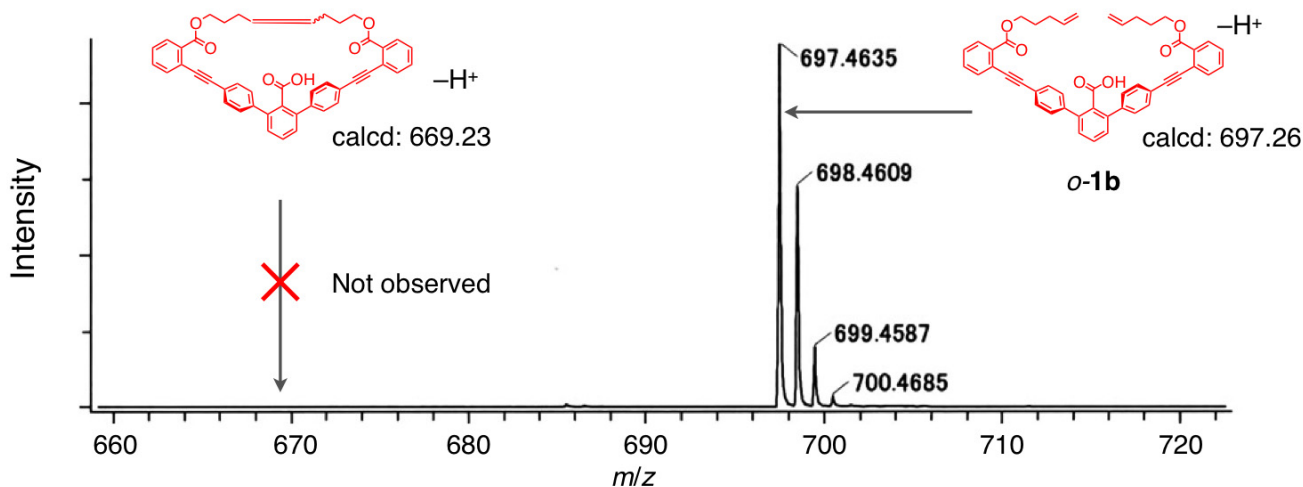

**Figure S2.** ESI-MS spectrum of the crude products after the reaction of *o*-1b with the 1st generation Grubbs' catalyst.

## 1.3. $^1\text{H}$ NMR (500 MHz, $\text{CDCl}_3$ , 25 $^\circ\text{C}$ ) Spectra of *p*-[1+1]Macrocycle (*p*-2) with Different *cis/trans* Ratios

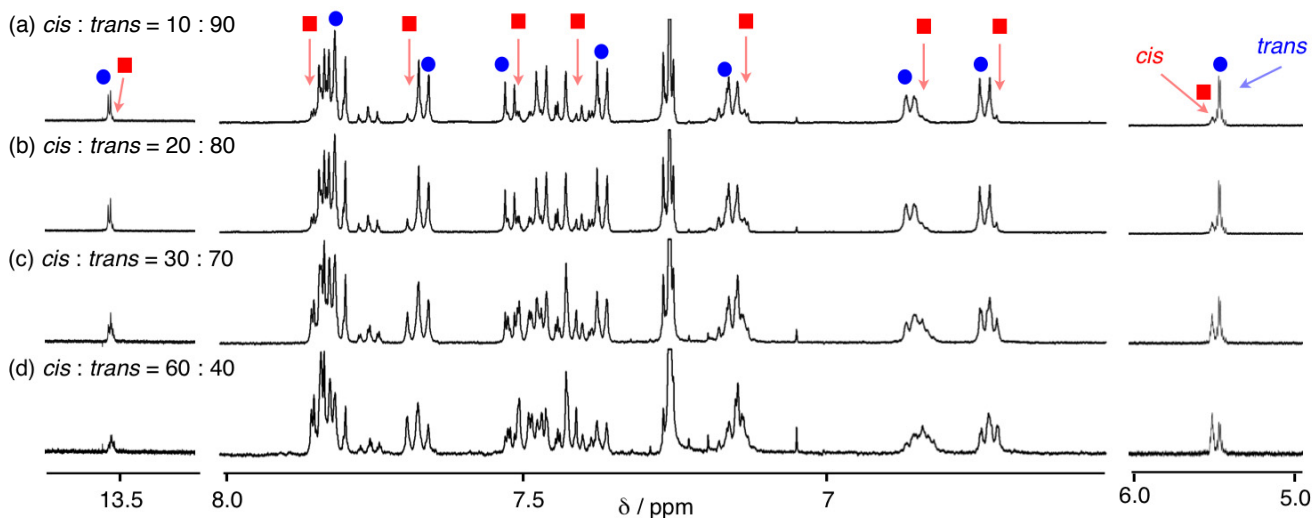

**Figure S3.** Partial  $^1\text{H}$  NMR spectra (500 MHz, 1.0 mM, 25  $^\circ\text{C}$ ) of *p*-2 with different *cis/trans* ratios in  $\text{CDCl}_3$ .

#### 1.4. CD Spectra of *m*-[1+1]Macrocycles (*m*-2)

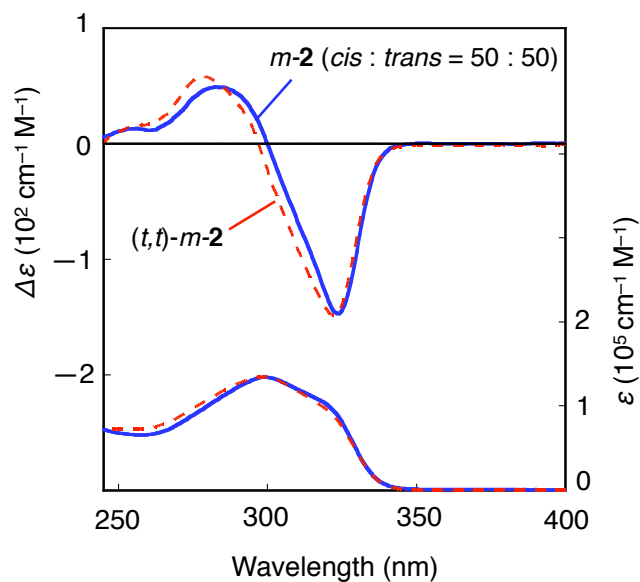

**Figure S4.** CD and absorption spectra of the (*trans, trans*)-*m*-[1+1]macrocycle ( $(t,t)\text{-}m\text{-}2$ ) and as prepared *m*-[1+1]macrocycle (*m*-2) (*trans* : *cis* = 50 : 50) in  $\text{CDCl}_3$  (0.1 mM) at 20 °C.

## 2. CD and Absorption Spectra of Models

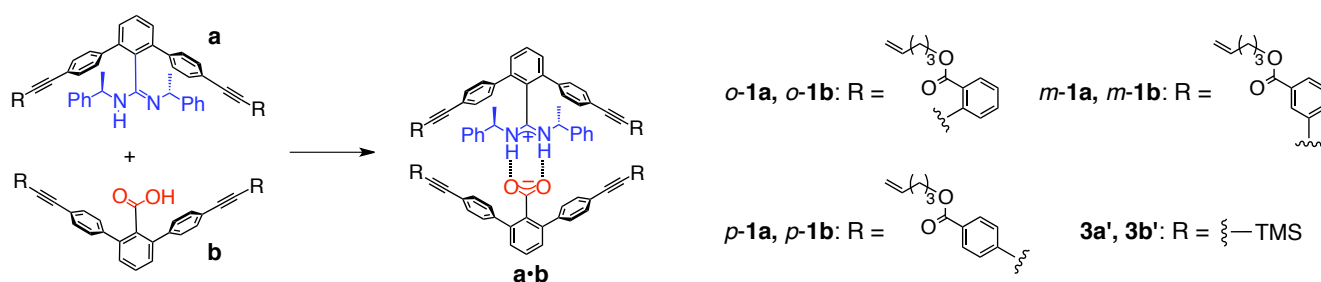

**A:  $o\text{-1a}\cdot o\text{-1b}$**

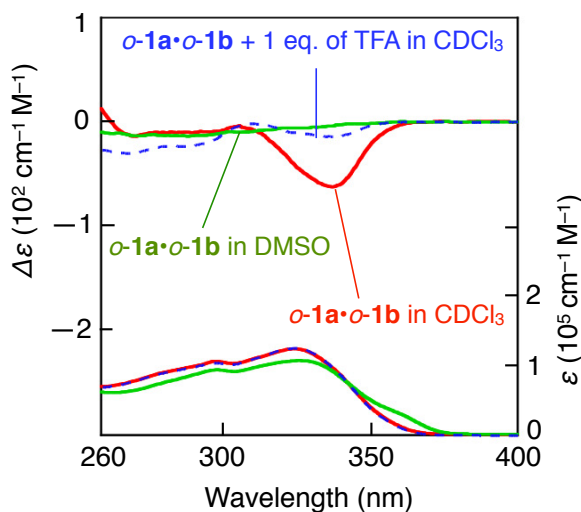

**B:  $m\text{-1a}\cdot m\text{-1b}$**

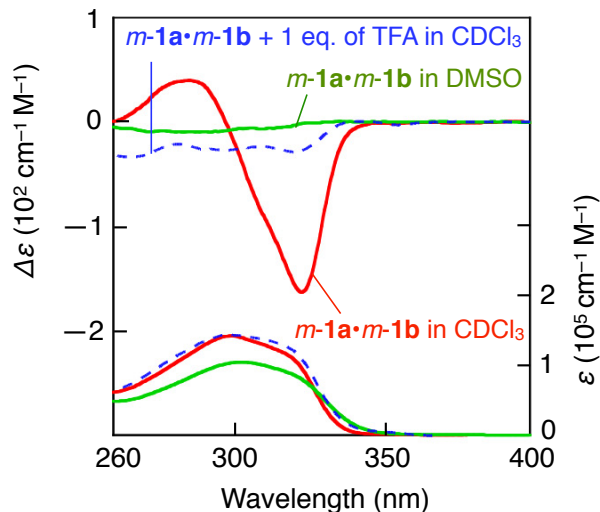

**C:  $p\text{-1a}\cdot p\text{-1b}$**

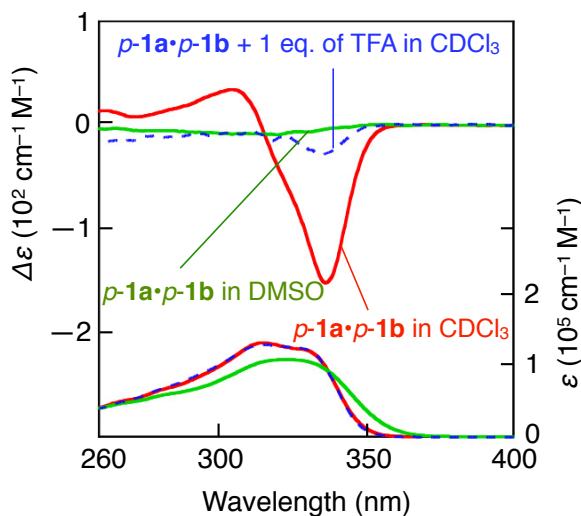

**D:  $3a'\cdot 3b'$**

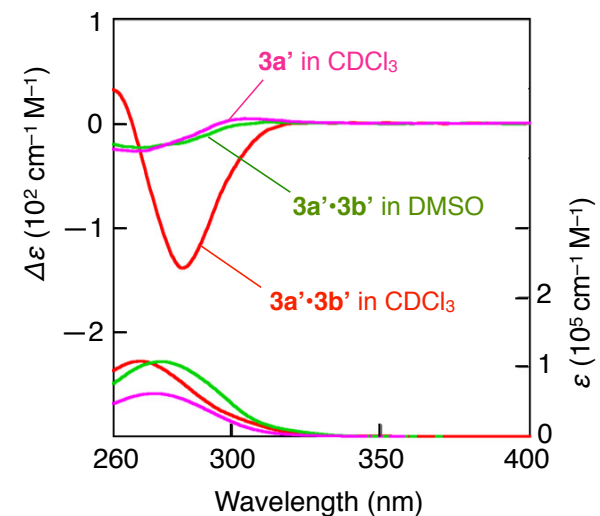

**Figure S5.** CD and absorption spectra of (A)  $o\text{-1a}\cdot o\text{-1b}$ , (B)  $m\text{-1a}\cdot m\text{-1b}$ , and (C)  $p\text{-1a}\cdot p\text{-1b}$  in  $\text{CHCl}_3$  (0.1 mM) (red) and DMSO (0.1 mM) (green) at 20 °C and after the addition of 1 equiv. of TFA in  $\text{CHCl}_3$  (0.1 mM) at 20 °C (dashed blue). (D) CD and absorption spectra of  $3a'$  (0.1 mM) in  $\text{CDCl}_3$  and  $3a'\cdot 3b'$  (0.1 mM) in  $\text{CDCl}_3$  and DMSO at 25 °C.<sup>S2</sup>

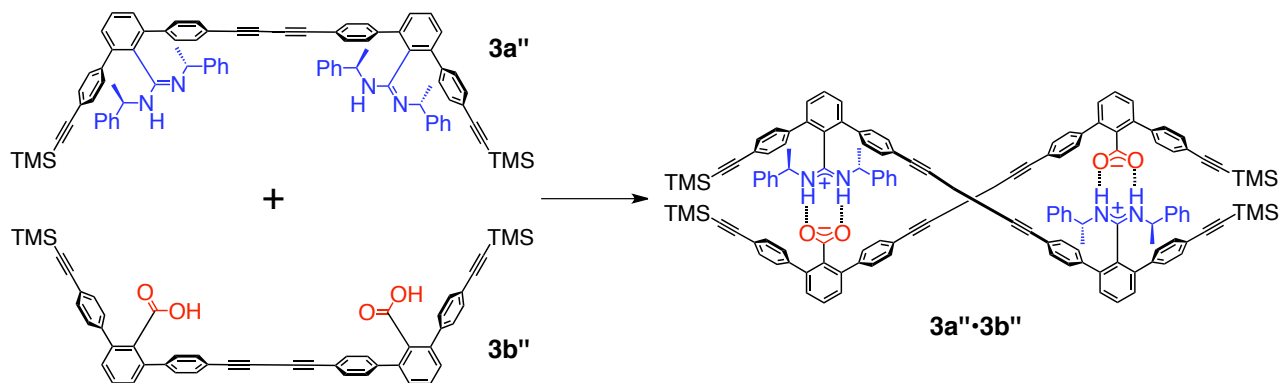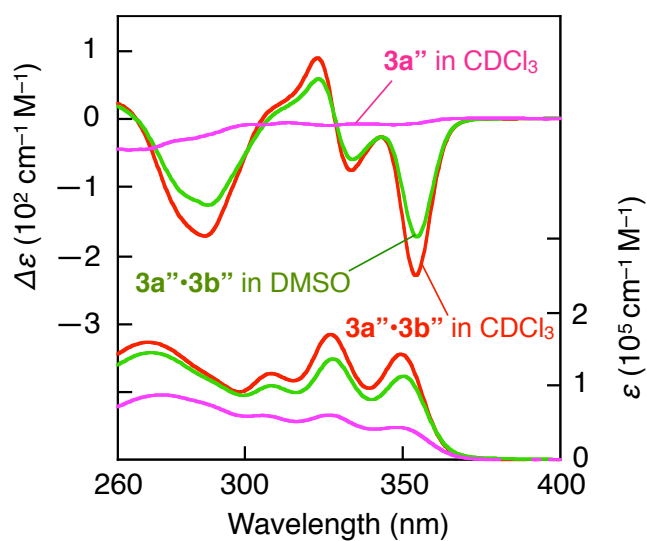

**Figure S6.** CD and absorption spectra of **3a''** (0.1 mM) in  $\text{CDCl}_3$  and **3a''·3b''** (0.1 mM) in  $\text{CDCl}_3$  and DMSO at 25 °C.<sup>S2</sup>

### 3. CD and Absorption Spectral Changes of [1+1]Macrocycles in Diluted Acidic Solution

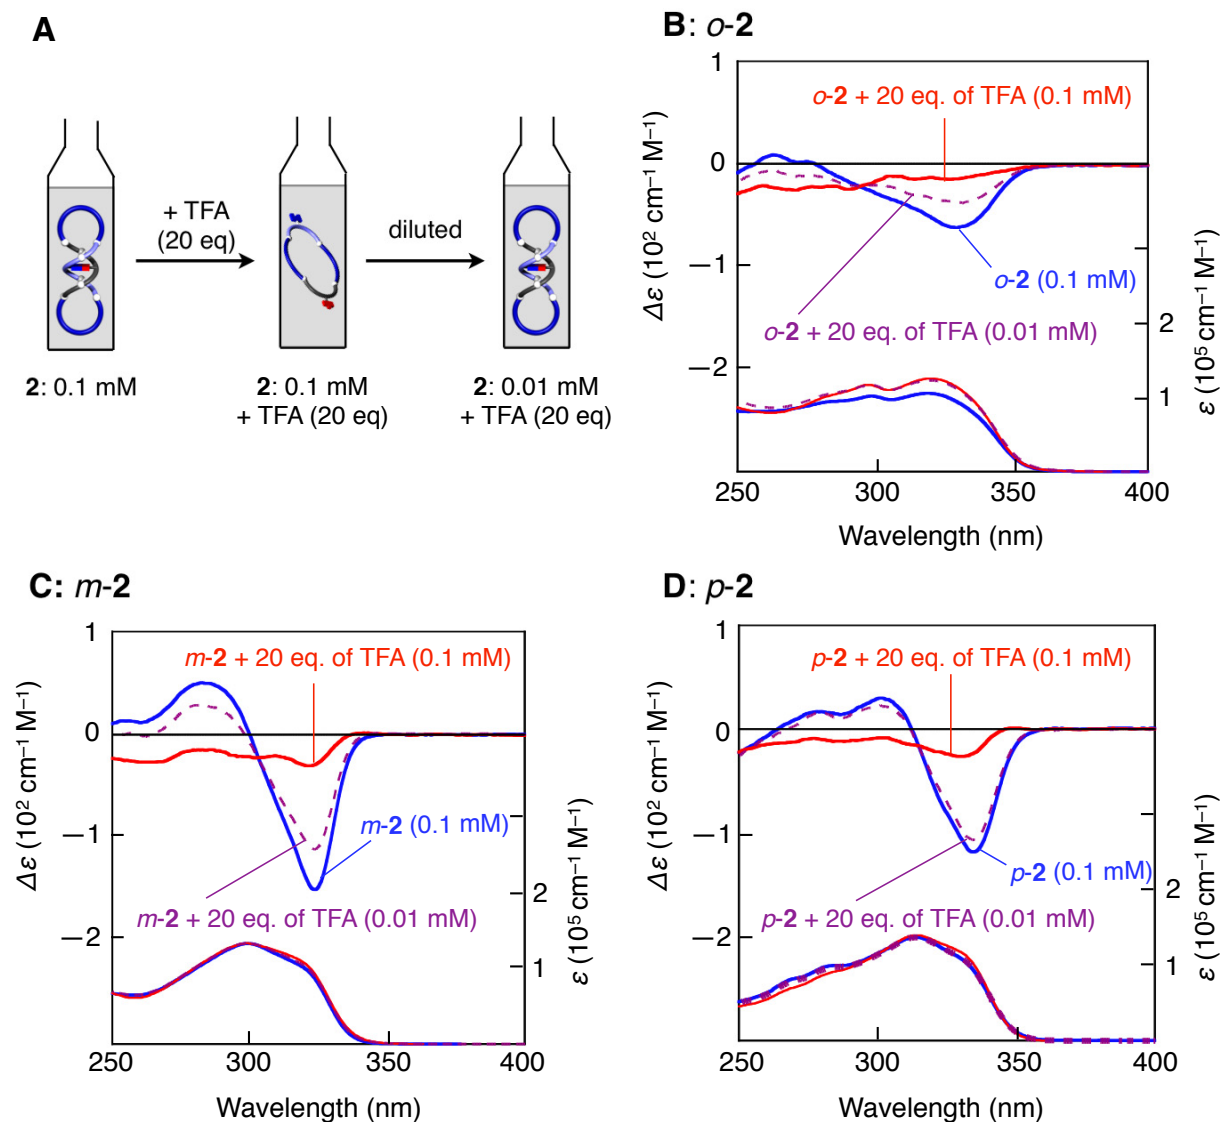

**Figure S7.** (A) Structural changes of macrocycles upon the addition of TFA followed by dilution. CD and absorption spectra of (B) *o*-2, (C) *m*-2, and (D) *p*-2 in CHCl<sub>3</sub> (0.1 mM) at 20 °C before (blue) and after the addition of 20 equiv. of TFA (red) followed by dilution with CHCl<sub>3</sub> (0.01 mM) (dashed violet).

#### 4. Time-Dependent CD, Absorption and Fluorescence Spectra of [1+1]Macrocycles in the Presence of $\text{Zn}(\text{ClO}_4)_2$

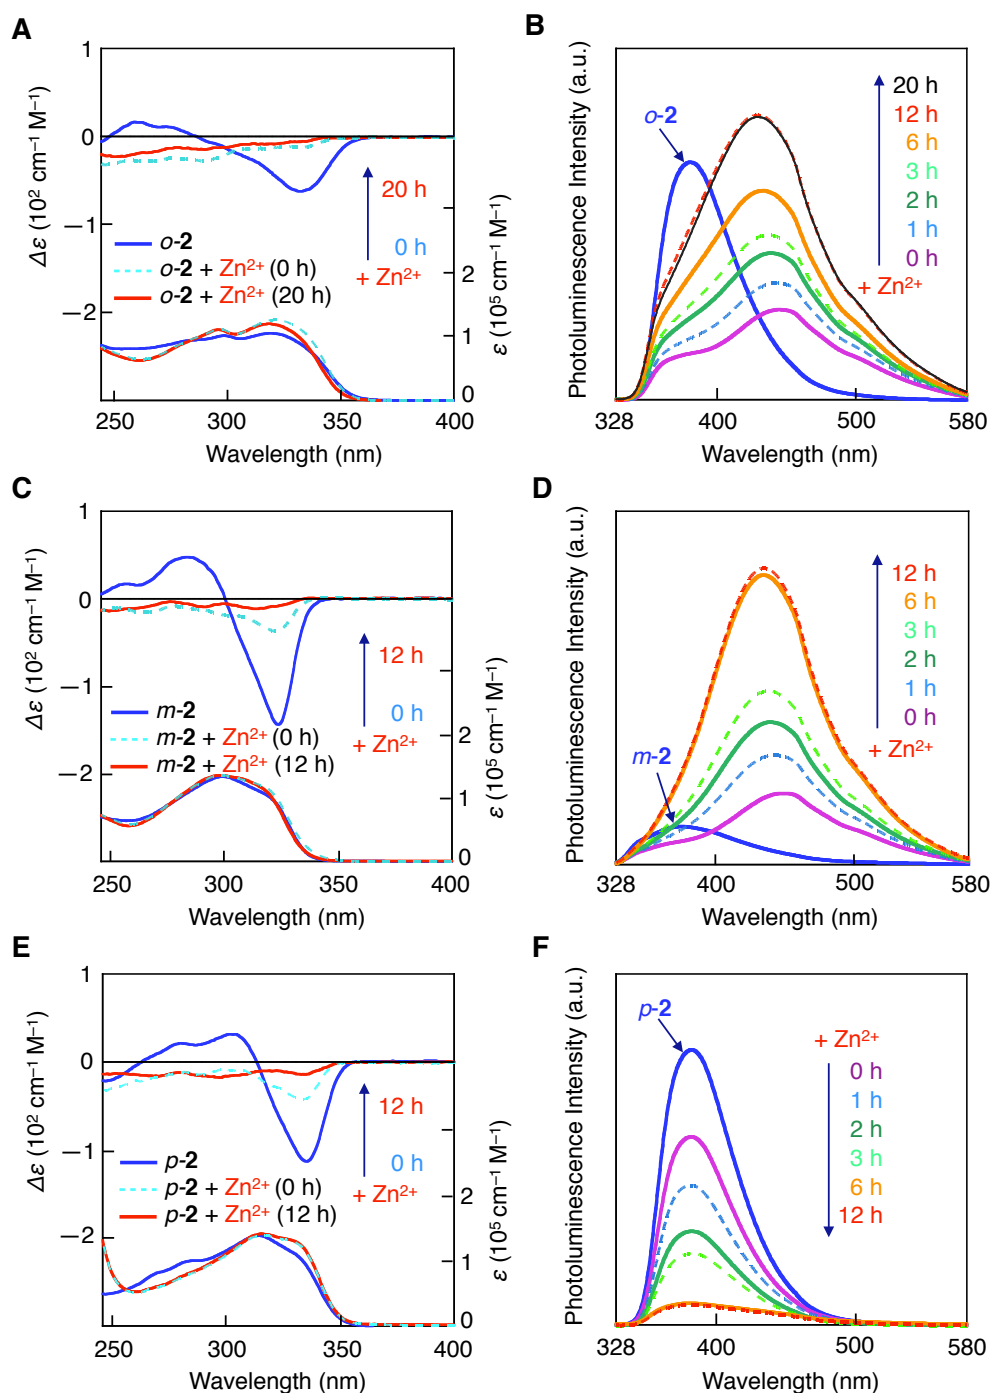

**Figure S8.** Time-dependent CD, absorption (A, C, E), and fluorescence spectra (B, D, F) of *o*-2 (A, B) ( $\lambda_{\text{ex}} = 313 \text{ nm}$ ), *m*-2 (C, D) ( $\lambda_{\text{ex}} = 300 \text{ nm}$ ), and *p*-2 (E, F) ( $\lambda_{\text{ex}} = 313 \text{ nm}$ ) in  $\text{CH}_2\text{Cl}_2/\text{THF}$  (10/1, 0.01 mM) at ambient temperature before (blue) and after the addition of 2 equiv. of  $\text{Zn}(\text{ClO}_4)_2$ .



## 5. Molecular-Mechanics Calculations of *trans-trans* and *cis-cis* Isomers of *m*-[1+1]Macrocyclic (*m*-2)

The molecular mechanics (MM)-calculations of the *trans-trans* and *cis-cis* isomers of the *m*-[1+1]macrocyclic (*m*-2) were performed on a Windows XP PC using the Compass Force Field as implemented in the Material Studio package (Version 4.1; Accelrys Inc.). The initial structures of the *trans-trans* and *cis-cis* isomers with a right-handed helical macrocyclic conformation were constructed based on the crystal structure of a double helical dimer comprising complementary amidine and carboxylic acid dimers linked by diacetylene residues bound together through salt bridges.<sup>S2</sup> The energy minimization was conducted using the Smart Minimizer of the Discover module using the Compass Force Field until the root-mean-square (r.m.s.) value became less than 0.1 kcal mol<sup>-1</sup> Å<sup>-1</sup>. The optimized structures indicate that the (*trans, trans*)-*m*-[1+1]macrocyclic appears to have a more highly strain structure than that of the (*cis, cis*)-isomer, resulting in the upfield shifts of the *m*-linked aromatic proton resonances, in particular *g* due to the ring current effect as observed in the <sup>1</sup>H NMR spectra (*d* and *e* in Fig. 2B).

### A: *Trans-trans* isomer of *m*-[1+1]macrocyclic (*m*-2)

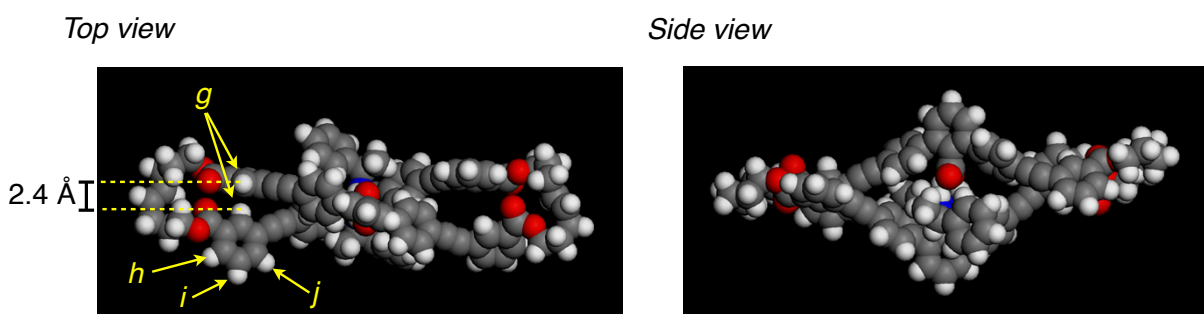

### B: *Cis-cis* isomer of *m*-[1+1]macrocyclic (*m*-2)

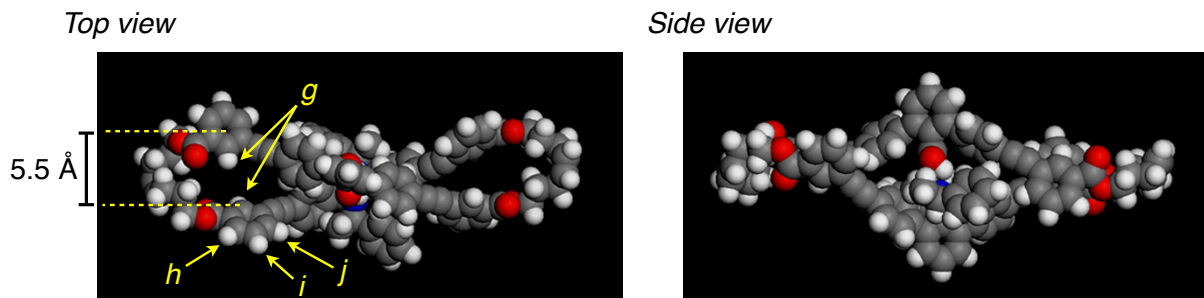

**Figure S9.** Space-filling drawings of the calculated structures of (A) *trans-trans* and (B) *cis-cis* isomers of the *m*-[1+1]macrocyclic. Hydrogen (white), carbon (gray), nitrogen (blue), and oxygen (red).

## 6. Supporting References

- (S1) T. Maeda, Y. Furusho, S.-i. Sakurai, J. Kumaki, K. Okoshi and E. Yashima, *J. Am. Chem. Soc.*, **2008**, *130*, 7938–7945.
- (S2) Y. Tanaka, H. Katagiri, Y. Furusho and E. Yashima, *Angew. Chem., Int. Ed.*, **2005**, *44*, 3867–3870.
